# Supplementary material for: Effect of the Particle Size and Layer Thickness of GNP Fillers on the Dielectric Properties and Actuated Strain of GNP–PDMS Composites
Source: MDPI journal article supplement (doi:10.3390/polym14183824), 2022-09-13
Supplement: s1 [file s1]

## Supplementary

### **Effect of the Particle Size and Layer Thickness of GNP Fillers on the Dielectric Properties and Actuated Strain of GNP–PDMS Composites**

Jin-Sung Seo <sup>1</sup>, Do-Hyeon Kim <sup>1</sup>, Heon-Seob Jung <sup>2</sup>, Ho-Dong Kim <sup>2</sup>, Jaewon Choi <sup>3</sup>,  
Minjae Kim <sup>4</sup>, Sung-Hyeon Baeck <sup>1</sup> and Sang-Eun Shim <sup>1, \*</sup>

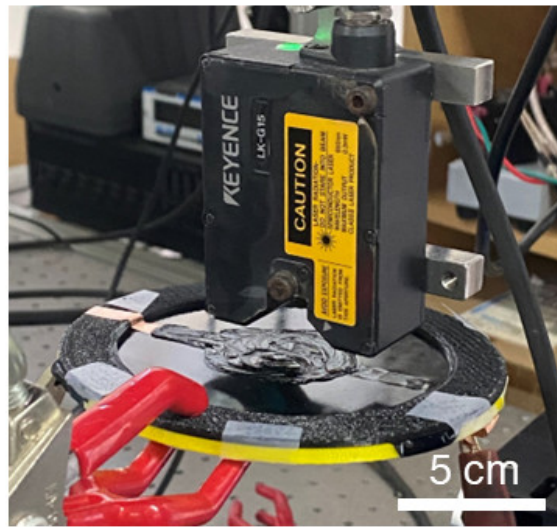

**Figure S1.** DEA circular test of PDMS/GNP sample using a laser sensor (laser doppler vibrometer).

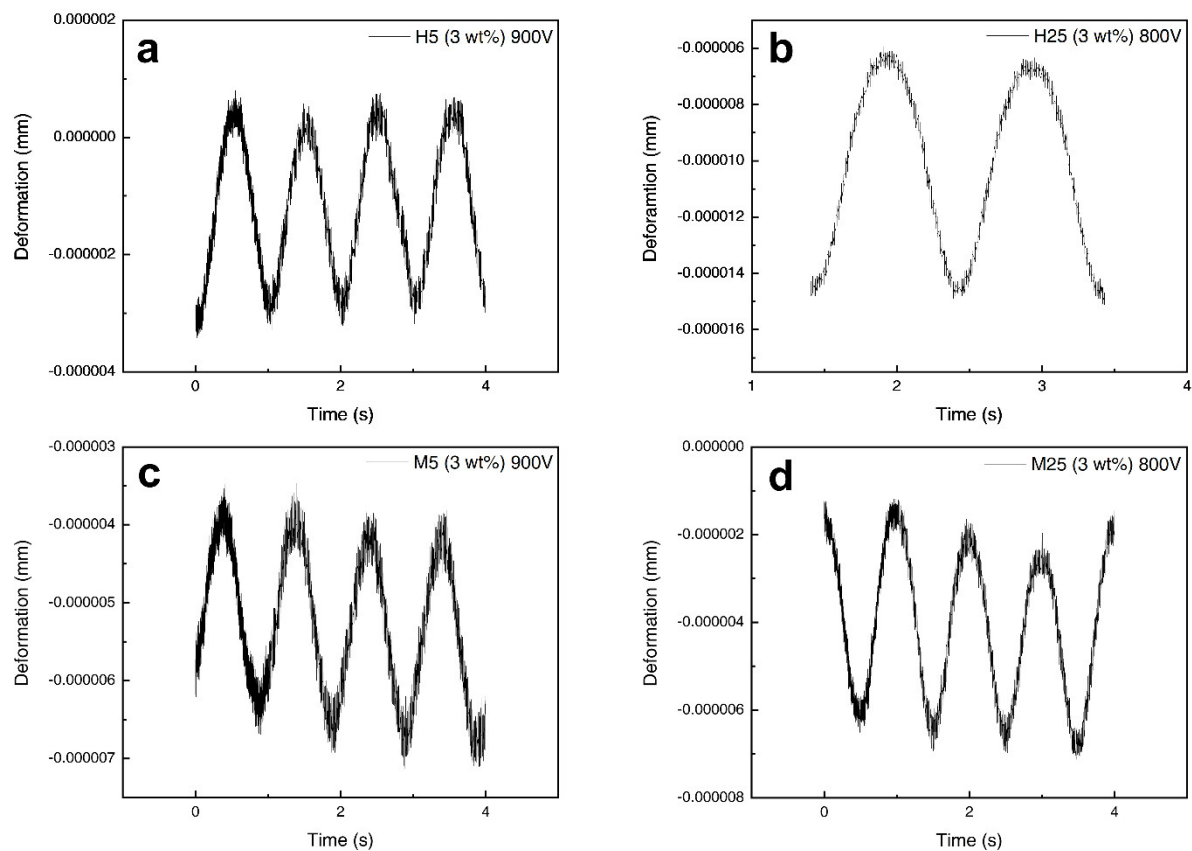

**Figure S2.** Deformation at maximum voltage of PDMS with 3 wt% addition of 4 grade GNPs measured with a laser doppler vibrometer.
